# Supplementary material for: Ubiquitin-like protein FAT10 promotes renal fibrosis by stabilizing USP7 to prolong CHK1-mediated G2/M arrest in renal tubular epithelial cells
Source: publisher site journal article supplement (doi:10.18632/aging.204301), 2022-09-22
Supplement: Supplementary file [file aging-v14i18-204301-supplementary-material-SD1.pdf]

**SUPPLEMENTARY FIGURES**

**A**

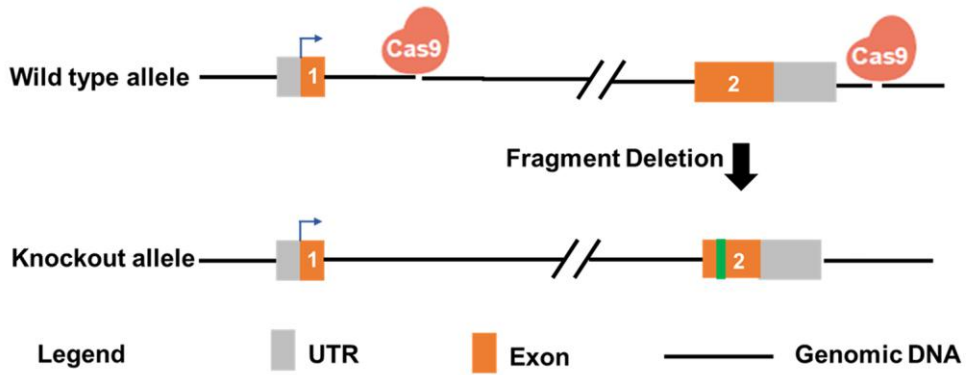

**B**

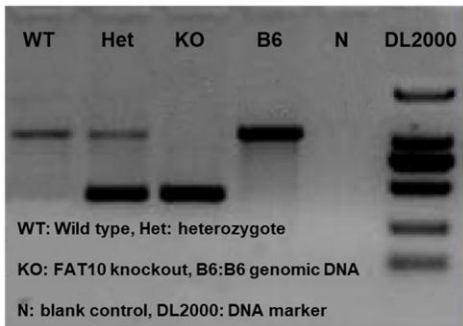

**C**

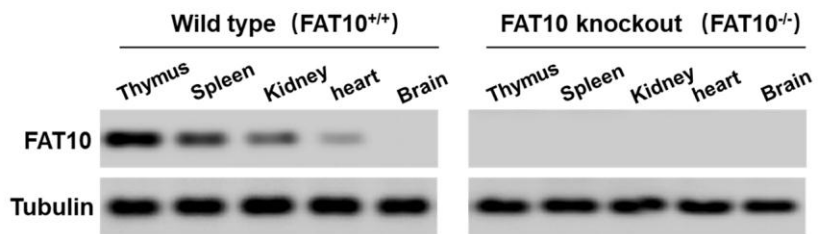

**Supplementary Figure 1. Construction of FAT10 knockout mice.** (A) Schematic diagram of FAT10-knockout mice (FAT10<sup>-/-</sup>) generation by the CRISPR-Cas9 technique. (B) Genotypes of different mice were identified by special primers. (C) Western blot showing FAT10 protein levels in thymus, spleen, kidney, heart and brain from wild type (FAT10<sup>+/+</sup>) and FAT10<sup>-/-</sup> mice.

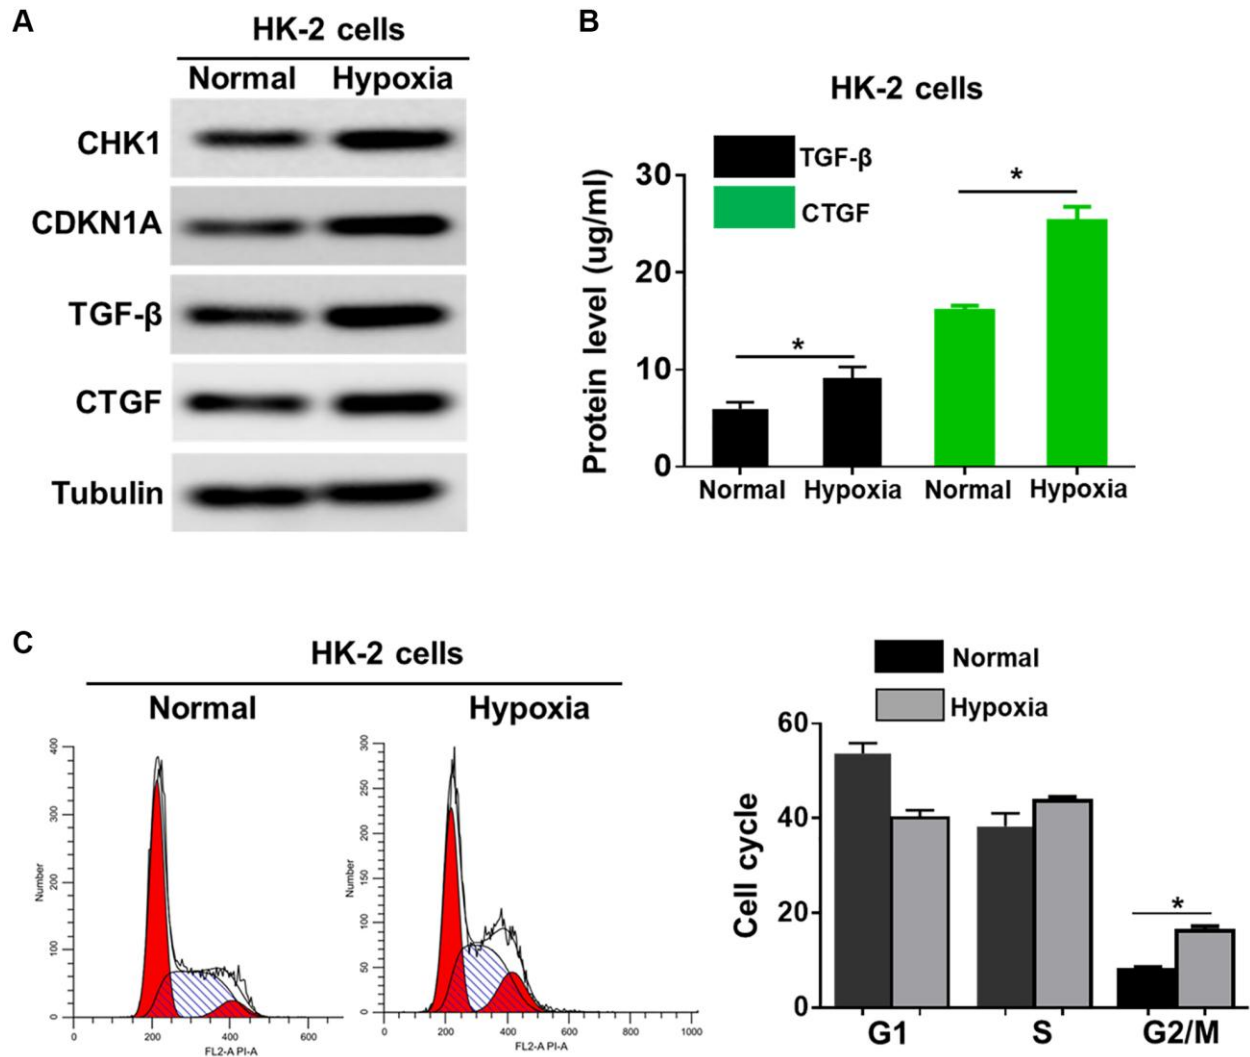

**Supplementary Figure 2. CHK1 is involved in hypoxia induced G2/M arrest in HK-2 cells.** (A) Western blotting showing the protein expression of CHK1, CDKN1A, TGF-β and CTGF in HK-2 cells following hypoxia injury. Tubulin was used as a loading control. (B) TGF-β and CTGF in the culture supernatants was measured in culture supernatants by ELISA assay. \**P* < 0.05. (C) Detection for cell cycle of HK-2 cells following hypoxia injury. Results are expressed as peak diagram (left) and calculated distribution for cells in G0/G1, S and G2/M phases (right). \**P* < 0.05.

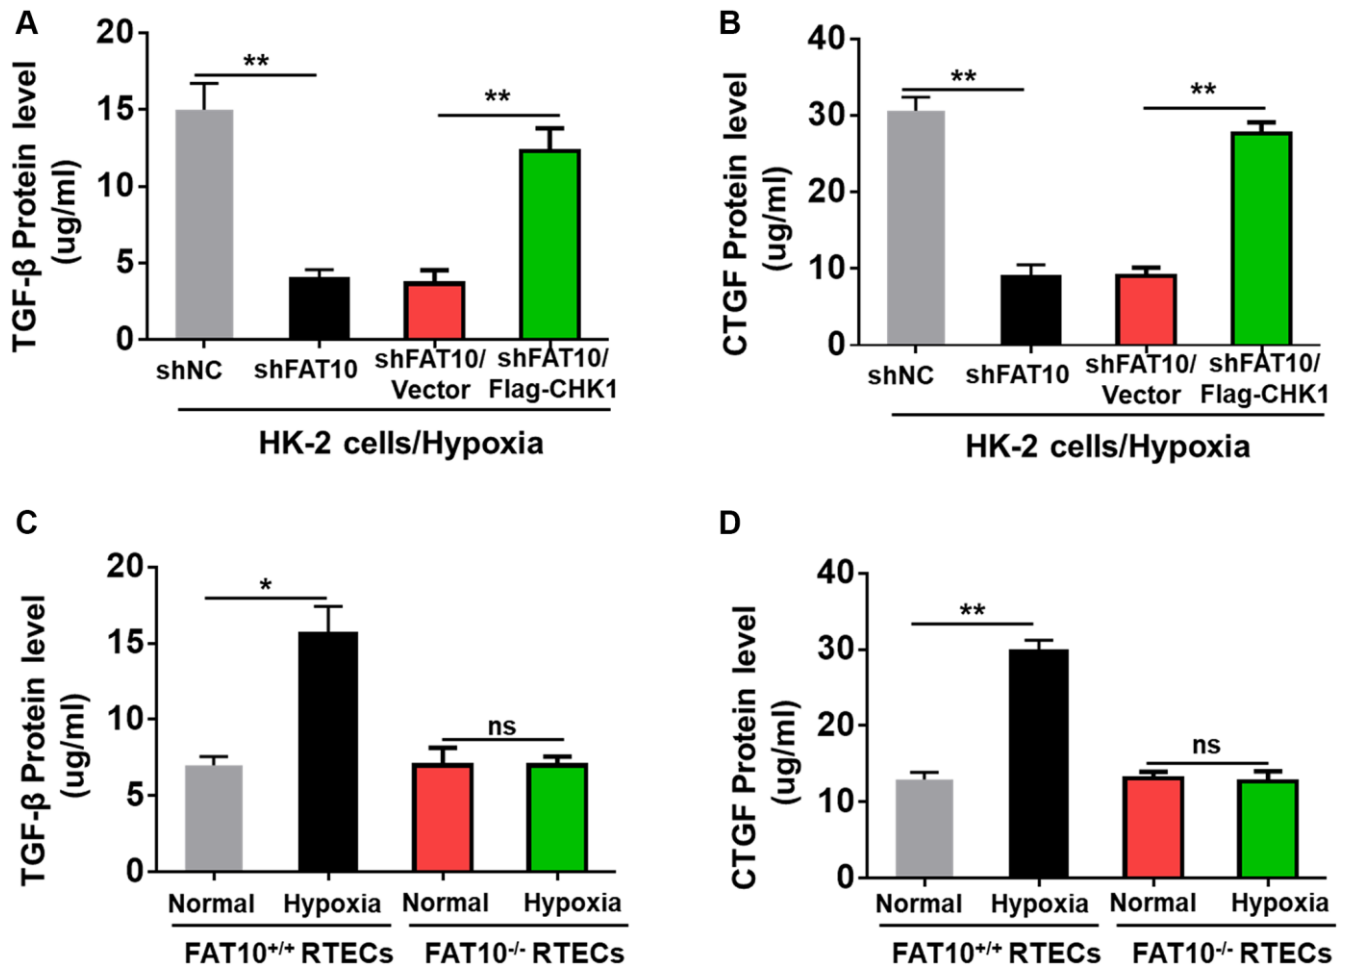

**Supplementary Figure 3.** (A–D) ELISA assay showing TGF- $\beta$  and CTGF in the culture supernatants was measured in the different experimental groups. \* $P < 0.05$ , \*\* $P < 0.01$ . Ns indicates no significance.

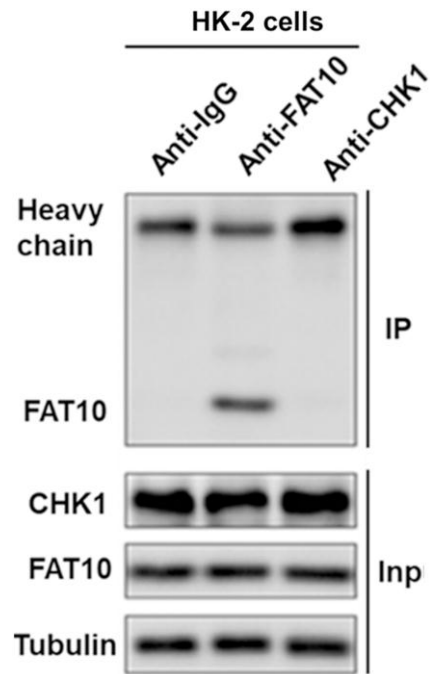

Supplementary Figure 4. Co-IP for endogenous FAT10 and CHK1 in HK-2 cells.

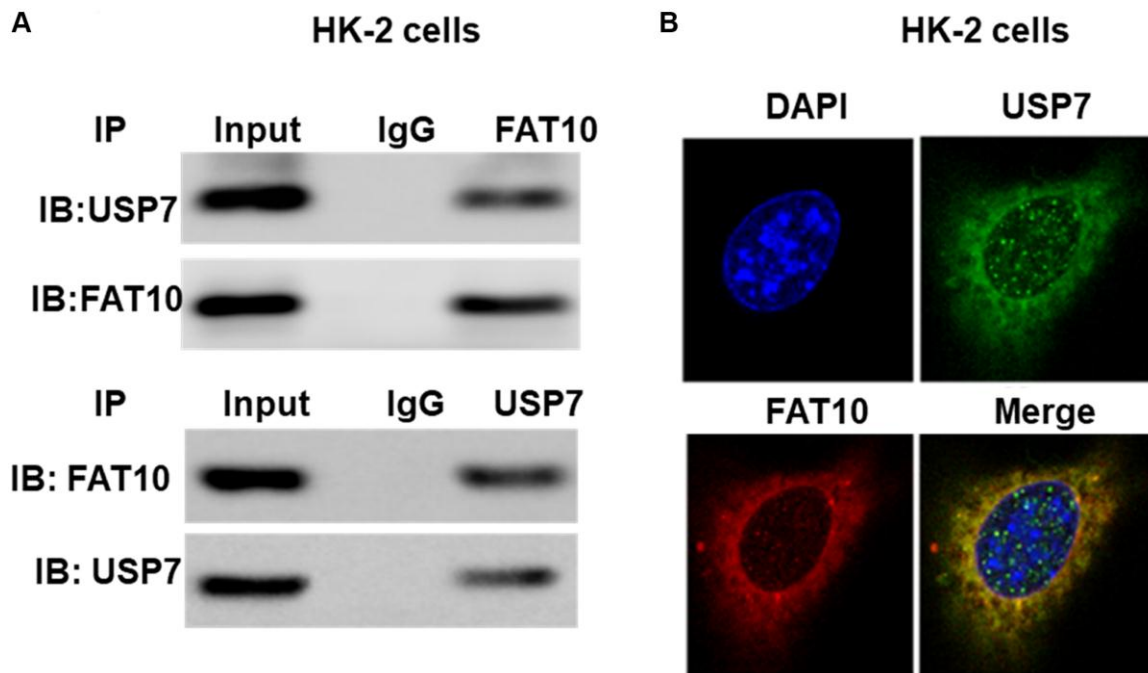

Supplementary Figure 5. FAT10 directly interacts with USP7. (A) Co-IP for endogenous FAT10 and USP7 in HK-2 cells. (B) Co-localization of FAT10 and USP7 in HK-2 cells; FAT10 (1:200) in red, USP7 (1:200) in green, and DAPI nuclear counterstaining in blue.

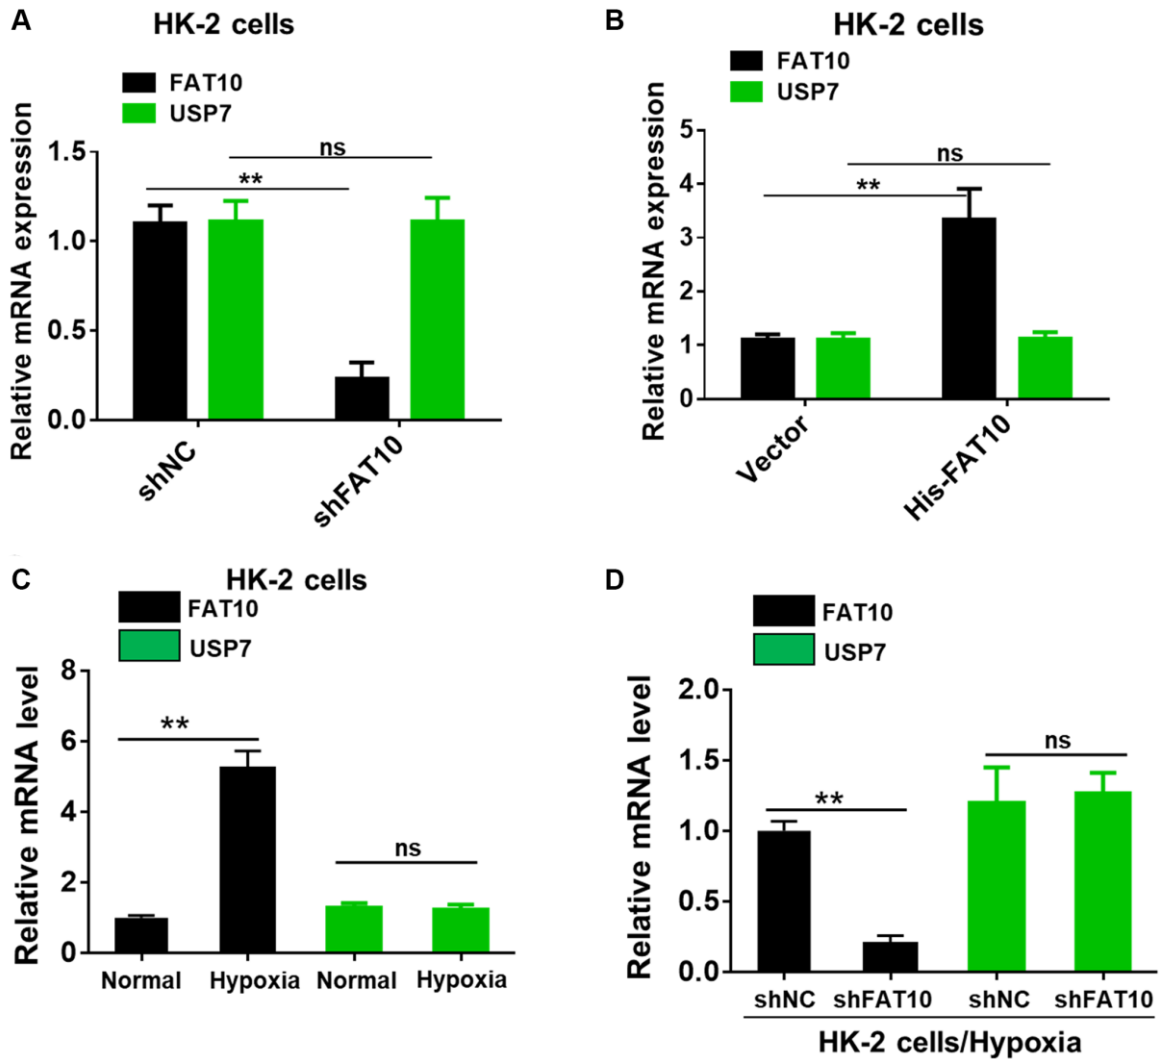

**Supplementary Figure 6. The mRNA levels of FAT10 and USP7 were detected.** (A and B) The mRNA levels of FAT10 and USP7 assessed by qRT-PCR in FAT10-overexpressing or FAT10-silenced HK-2 cells.  $**P < 0.01$ . Ns indicates no significance. (C and D) The mRNA levels of FAT10 and USP7 assessed by qRT-PCR in HK-2 cells (C) or FAT10-silenced HK-2 cells (D) following treatment with hypoxia or without hypoxia.  $**P < 0.01$ . Ns indicates no significance.

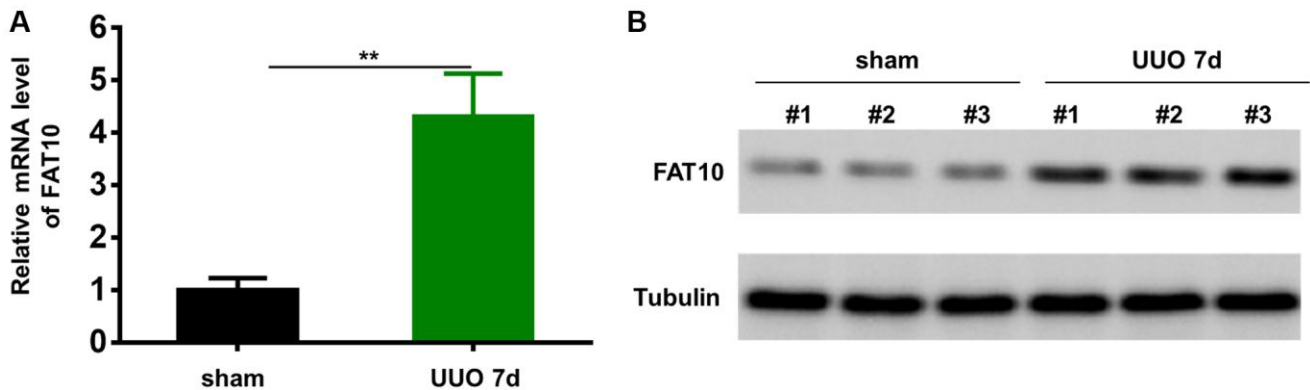

**Supplementary Figure 7. Expression level of FAT10 is upregulated in obstructed kidney tissues.** (A) Expression levels of FAT10 mRNA in kidney tissues of sham and UUO mice as detected by qRT-PCR.  $N = 6$ ,  $**P < 0.01$  compared to the sham group. (B) Protein expression levels of FAT10 in kidney tissues of sham and UUO mice as detected by Western blotting. Tubulin was used as a loading control.

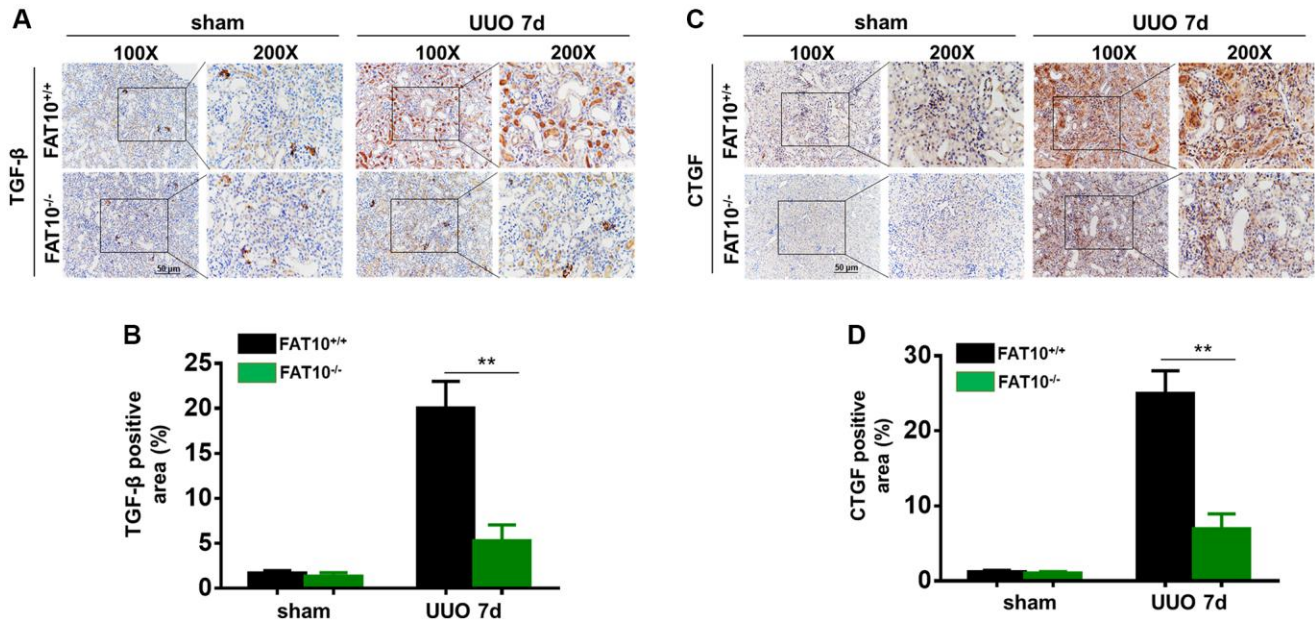

**Supplementary Figure 8. Expression level of TGF- $\beta$  and CTGF is upregulated in obstructed kidney tissues.** (A) Immunohistochemistry of protein expression of TGF- $\beta$  in obstructed kidneys from FAT10<sup>+/+</sup> and FAT10<sup>-/-</sup> mice subjected to either UUO or sham operation. (B) Bar graph shows quantification of areas of TGF- $\beta$  positive cells; \*\* $P < 0.01$  versus FAT10<sup>+/+</sup> mice at the same time point;  $n = 6$ . (C) Immunohistochemistry of protein expression of CTGF in obstructed kidneys from FAT10<sup>+/+</sup> and FAT10<sup>-/-</sup> mice subjected to either UUO or sham operation. (D) Bar graph shows quantification of areas of CTGF positive cells; \*\* $P < 0.01$  versus FAT10<sup>+/+</sup> mice at the same time point;  $n = 6$ .
